# Supplementary material for: Functional analysis of Orco and odorant receptors in odor recognition in Aedes albopictus
Source: PubMed Central journal article supplement (PMC4924234; doi:10.1186/s13071-016-1644-9), 2016-06-27
Supplement: 13071_2016_1644_MOESM5_ESM.pdf [file 13071_2016_1644_MOESM5_ESM.pdf]

Protein of AalOrco

MNVQPTKYHGLVLDLMPNIRLMQGFHFLFRYVSGPVLIRKLYSWWNLIMIL  
LQYFAIMGNLVMNTGDVNELTANTITLFFTHSVTKFIYVAVNSEHFYRTLGI  
WNQPNSHSLFAESDARYHSIALAKMRKLLVMVMVTTVLSVVAWITITFFGDS  
VKNVFDKETNETYTVEIPRLPIKALYPWDAMSGVPYFFSFVYQAYFLLFSMC  
QANLADVMFCSWLLFTCEQLQHLKGIMRPLMELSASLDTYRPNSAALFRAAS  
AGSKAELILNEEKDPDTKDFDLNGIYNSKADWGAQFRAPSTLQTFNDNNGM  
NGNPNGLTKKQELMVRSAIKYWVERHKKHVRLVSAIGETYGAALLHMLTS  
TIKLTLLAYQATKIDALNVYGLTVIGYLVYALAQVFLFCIFGNRLIEESSVME  
AAYSCHWYDGSSEAKTFVQIVCQQCQKAMTISGAKFFTVSLDLFASVLGAV  
VTYFMVLVQLK-

Protein of AalOR10

MESILSCPIVSVNARVWRFWSFVLKHDAMRYISIIPVTVMTFFMFLDLGHSWG  
DFQDVIIKGYFAVLVFNALVRLTLILVKDRKLYENFMEGISKFYFEISRIDDHQI  
QSLSSYTARARMLSSISNLALGAIISTCFTVYPMFTGVRGLPYGMYIPGVDGY  
QSPQYEIIYLQVVLTFFPGCCMYIPFTSFFVSTTLFGLVQIKTLQRQLQTFKDI  
GSHENKNANLQVIKLIQDHKRIIAYVSELNSLVTYICFVEFLSFGLMLCALLFL  
LNVIENHAQIVIVAAYIFMIISQIFAFYWHANEVREESINIAEAAAYSGPWVELD  
DSIKKKLLLILRAQQPLEITVGNVYPMTLEMFQSLNASYSYFTLLRRVYN

Protein of AalOR88

MDRFRQAATQVRIQYRVLKLTYYWHYEPDKDFYRLVNIFLSLSGVCYTPANVW  
ERIAWGCYQAISVCHYFLTLIHFVEALVEWKHLVPIIWNFVEFFMMCTAICKSN  
IIQHMKELAAQKFNRRQAASGDSEEDSKARKVLFKIIQTLPGTLIWVIGTV  
VVLAAITIGPDDPLFGQSQFFHRHLSGWKARIVHIVLNSALFPIWVGKTYCSTI  
LISCLLMGLKTELTIMSQRFSVLCDFEHTSLEKFQESLMVCLRQQNQILDQMI  
QLQSLVRYDFLVVYYGGLITIGSLIFIPTTDGLTIGSFILTLGITVFFIESFLWCWL  
VESFGNINDTIEEKIMDVIVMIPHDATAHSEYIRLRTQLMIMKIGTRFSAKFNCG  
GVFDITVEAVGKLLNITYSLVTFLLNFT-
